# Supplementary material for: Electroacupuncture Improves Antidepressant Effects in CUMS Rats by Protecting Hippocampal Synapse and Mitochondrion: An Ultrastructural and iTRAQ Proteomic Study
Source: Hindawi journal article supplement (doi:10.1155/2019/3424698), 2019-04-17
Supplement: f1 [file 3424698.f1.pdf]

**Table 1. Up-regulated synaptic proteins compared EA to CUMS**

| Name                                       | cellular component                                                                                                                                                | biological process                                                                                                                                                                                                                                                                                                                        | molecular function                                                                                                                                                                                                                                     |
|--------------------------------------------|-------------------------------------------------------------------------------------------------------------------------------------------------------------------|-------------------------------------------------------------------------------------------------------------------------------------------------------------------------------------------------------------------------------------------------------------------------------------------------------------------------------------------|--------------------------------------------------------------------------------------------------------------------------------------------------------------------------------------------------------------------------------------------------------|
| Heat shock cognate 71 kDa protein          | dendrite;<br>synaptic vesicle;<br><b>postsynaptic density</b> ;<br>neuron projection                                                                              | response to heat;<br>protein import into nucleus;<br>cerebellum development;<br>positive regulation of lysosomal membrane permeability;<br>response to activity;<br>response to odorant;<br>response to estradiol;<br>negative regulation of transcription, DNA-templated;<br>response to drug;<br>positive regulation of gene expression | ADP binding;<br>ATP binding;<br>receptor binding;<br>clathrin-uncoating ATPase activity;<br>prostaglandin binding;<br>RNA binding;<br>ATPase activity, coupled;<br>nucleotide binding;<br>unfolded protein binding;<br>transcription factor binding    |
| Calponin-3                                 | dendrite;<br><b>postsynaptic density</b> ;<br>neuronal cell body;<br>dendritic spine;<br>focal adhesion;<br>microtubule;<br>actin filament;<br>actin cytoskeleton | epithelial cell differentiation;<br>negative regulation of ATPase activity;<br>actomyosin structure organization                                                                                                                                                                                                                          | calmodulin binding;<br>microtubule binding;<br>actin binding;<br>protein binding, bridging                                                                                                                                                             |
| Abl interactor 1                           | <b>postsynaptic density</b> ;<br>neuron projection                                                                                                                | lamellipodium morphogenesis;<br>somitogenesis;<br>positive regulation of protein tyrosine kinase activity;<br>peptidyl-tyrosine phosphorylation;<br>cellular process;<br>megakaryocyte development                                                                                                                                        | protein tyrosine kinase activator activity;<br>protein complex binding;<br>transcription factor binding;<br>protein binding                                                                                                                            |
| p55 protein                                | <b>postsynaptic density</b>                                                                                                                                       |                                                                                                                                                                                                                                                                                                                                           |                                                                                                                                                                                                                                                        |
| COP9 signalosome complex subunit 4         | <b>synaptic vesicle</b> ;<br>synapse                                                                                                                              | protein deneddylation;<br>cullin deneddylation                                                                                                                                                                                                                                                                                            | NEDD8-specific protease activity;<br>protein binding                                                                                                                                                                                                   |
| Phosphatidylethanolamine-binding protein 1 | <b>synaptic vesicle</b> ;<br>neuron projection;<br>axon terminus;<br>neuronal cell body;<br>myelin sheath                                                         | hippocampus development;<br>positive regulation of cAMP-mediated signaling;<br>negative regulation of peptidase activity;<br>spermatid development;<br>response to heat;<br>response to corticosterone;<br>response to organic cyclic compound;<br>positive regulation of mitotic nuclear division;<br>MAPK cascade;                      | ATP binding;<br>serine-type endopeptidase inhibitor activity;<br>receptor binding;<br>protein kinase binding;<br>mitogen-activated protein kinase binding;<br>nucleotide binding;<br>peptidase inhibitor activity;<br>lipid binding;<br>kinase binding |

|                                                |                                                                |  |                                                                                                                                                                                                                                                                                                                                                                                                                                                                                      |                                                                                                                                                                                                                                                                                                                  |
|------------------------------------------------|----------------------------------------------------------------|--|--------------------------------------------------------------------------------------------------------------------------------------------------------------------------------------------------------------------------------------------------------------------------------------------------------------------------------------------------------------------------------------------------------------------------------------------------------------------------------------|------------------------------------------------------------------------------------------------------------------------------------------------------------------------------------------------------------------------------------------------------------------------------------------------------------------|
|                                                |                                                                |  | response to organonitrogen compound                                                                                                                                                                                                                                                                                                                                                                                                                                                  |                                                                                                                                                                                                                                                                                                                  |
| Platelet glycoprotein Ib beta chain            | <b>synaptic vesicle;</b><br>axon terminus;<br>synapse          |  | positive regulation of exocytosis;<br>regulation of exocytosis                                                                                                                                                                                                                                                                                                                                                                                                                       | syntaxin binding;<br>nucleotide binding;<br>GTP binding                                                                                                                                                                                                                                                          |
| Alpha-synuclein                                | <b>synaptic vesicle;</b><br>axon terminus;<br>cytoskeleton     |  | regulation of dopamine secretion;<br>dopamine biosynthetic process;<br>response to interleukin-1;<br>positive regulation of peptidyl-serine phosphorylation;<br>activation of cysteine-type endopeptidase activity involved in apoptotic process;<br>synaptic vesicle transport;<br>long-term synaptic potentiation;<br>regulation of neuronal synaptic plasticity;<br>negative regulation of platelet-derived growth factor receptor signaling pathway;<br>response to iron(II) ion | dynein binding;<br>beta-tubulin binding;<br>identical protein binding;<br>magnesium ion binding;<br>cysteine-type endopeptidase inhibitor activity involved in apoptotic process;<br>calcium ion binding;<br>phospholipase binding;<br>arachidonic acid binding;<br>alpha-tubulin binding;<br>copper ion binding |
| Gamma-enolase                                  | synaptic membrane;<br>neuron projection                        |  | glycolytic process;<br>gluconeogenesis;<br>response to organic cyclic compound;<br>response to estradiol;<br>response to drug                                                                                                                                                                                                                                                                                                                                                        | magnesium ion binding;<br>protein heterodimerization activity;<br>lyase activity;<br>protein homodimerization activity;<br>phosphopyruvate hydratase activity;<br>metal ion binding                                                                                                                              |
| NADH dehydrogenase (Ubiquinone) Fe-S protein 7 | synaptic membrane;<br>neuron projection;<br>neuronal cell body |  | mitochondrial respiratory chain complex I assembly;<br>oxidation-reduction process                                                                                                                                                                                                                                                                                                                                                                                                   | quinone binding;<br>iron-sulfur cluster binding;<br>NADH dehydrogenase (ubiquinone) activity;<br>NADH dehydrogenase activity;<br>oxidoreductase activity;<br>4 iron, 4 sulfur cluster binding;<br>protease binding;<br>metal ion binding                                                                         |

**Table 2.. Down-regulated synaptic proteins compared EA to CUMS**

| Name                                                 | cellular component                                                                                                         | biological process                                                                                                                                                                      | molecular function                                                                                                                                                                                  |
|------------------------------------------------------|----------------------------------------------------------------------------------------------------------------------------|-----------------------------------------------------------------------------------------------------------------------------------------------------------------------------------------|-----------------------------------------------------------------------------------------------------------------------------------------------------------------------------------------------------|
| Potassium voltage-gated channel subfamily D member 2 | dendrite;<br><b>postsynaptic density;</b><br>neuron projection;<br>voltage-gated potassium channel complex;<br>perikaryon; | protein heterooligomerization;<br>transport;<br>protein homooligomerization;<br>cellular response to hypoxia;<br>transmembrane transport;<br>ion transport;<br>potassium ion transport; | ion channel activity;<br>A-type (transient outward) potassium channel activity;<br>potassium channel activity;<br>protein heterodimerization activity;<br>voltage-gated potassium channel activity; |

|                                                                    |                                                                                                                                 |                                                                                                                                                                                                                                                                                                                                                           |                                                                                                                                                                                                                         |
|--------------------------------------------------------------------|---------------------------------------------------------------------------------------------------------------------------------|-----------------------------------------------------------------------------------------------------------------------------------------------------------------------------------------------------------------------------------------------------------------------------------------------------------------------------------------------------------|-------------------------------------------------------------------------------------------------------------------------------------------------------------------------------------------------------------------------|
|                                                                    | cell junction;<br>neuronal cell body<br>membrane                                                                                | action potential;<br>cardiac muscle cell action potential;<br>potassium ion transmembrane<br>transport                                                                                                                                                                                                                                                    | delayed rectifier potassium channel<br>activity;<br>protein binding;<br>voltage-gated ion channel activity;<br>metal ion binding                                                                                        |
| Protein Neto1                                                      | <b>postsynaptic density</b> ;<br>synapse;<br>excitatory synapse;<br><b>kainate selective<br/>glutamate receptor<br/>complex</b> | regulation of neuronal synaptic<br>plasticity;<br>regulation of long-term neuronal<br>synaptic plasticity;<br>visual learning;<br>receptor localization to synapse;<br>positive regulation of excitatory<br>postsynaptic potential;<br>memory                                                                                                             | ionotropic glutamate receptor binding                                                                                                                                                                                   |
| Ras-related<br>Rab-8B                                              | protein <b>synaptic vesicle</b>                                                                                                 | protein transport;<br>adherens junction organization;<br>protein secretion;<br>vesicle docking involved in<br>exocytosis;<br>positive regulation of cell projection<br>organization;<br>small GTPase mediated signal<br>transduction;<br>transport;<br>cellular response to insulin stimulus;<br>regulation of exocytosis;<br>synaptic vesicle exocytosis | GDP binding;<br>GTPase activity;<br>receptor binding;<br>nucleotide binding;<br>protein binding;<br>TPR domain binding;<br>GTP binding                                                                                  |
| Protein Sypl1                                                      | <b>synaptic vesicle</b>                                                                                                         | transport                                                                                                                                                                                                                                                                                                                                                 | transporter activity                                                                                                                                                                                                    |
| Protein Syngn3                                                     | <b>synaptic vesicle</b> ;<br>synaptic vesicle<br>membrane;<br>synapse                                                           | substantia nigra development;<br>positive regulation of transporter<br>activity                                                                                                                                                                                                                                                                           | SH2 domain binding;<br>protein N-terminus binding                                                                                                                                                                       |
| Brefeldin A-inhibited<br>guanine nucleotide-<br>exchange protein 2 | dendrite;<br>symmetric synapse;<br>cytoskeleton                                                                                 | positive regulation of tumor necrosis<br>factor production;<br>protein transport;<br>receptor recycling;<br>transport;<br>positive regulation of GTPase<br>activity;<br>regulation of ARF protein signal<br>transduction;<br>exocytosis;<br>endomembrane system organization;<br>Golgi to plasma membrane transport;<br>intracellular signal transduction | guanyl-nucleotide exchange factor<br>activity;<br>GABA receptor binding;<br>myosin binding;<br>protein kinase A regulatory subunit<br>binding;<br>ARF guanyl-nucleotide exchange<br>factor activity;<br>protein binding |
| Sodium/hydrogen<br>exchanger                                       | dendrite;<br>axon terminus;<br>synapse                                                                                          | neuron projection morphogenesis;<br>sodium ion transport;<br>transport;<br>regulation of pH;                                                                                                                                                                                                                                                              | solute:proton antiporter activity;<br>sodium:proton antiporter activity;<br>antiporter activity                                                                                                                         |

regulation of neurotrophin TRK  
 receptor signaling pathway;  
 synapse organization;  
 transmembrane transport;  
 dendritic spine development;  
 ion transport;  
 axon extension

**Table 3. Up-regulated mitochondrial proteins compared EA to CUMS**

| Name                                                                 | cellular component                                                                                                                                                                                                                                                                                                      | biological process                                                                                                                                                                                                                                                                                                                                 | molecular function                                                                                                                                                                                                                                                                                                          |
|----------------------------------------------------------------------|-------------------------------------------------------------------------------------------------------------------------------------------------------------------------------------------------------------------------------------------------------------------------------------------------------------------------|----------------------------------------------------------------------------------------------------------------------------------------------------------------------------------------------------------------------------------------------------------------------------------------------------------------------------------------------------|-----------------------------------------------------------------------------------------------------------------------------------------------------------------------------------------------------------------------------------------------------------------------------------------------------------------------------|
| NADH dehydrogenase (Ubiquinone) protein 8 (Predicted), isoform CRA a | mitochondrial respiratory chain<br>Fe-S<br><b>complex I;</b>                                                                                                                                                                                                                                                            | mitochondrial respiratory chain complex I;                                                                                                                                                                                                                                                                                                         | NADH dehydrogenase (Ubiquinone) Fe-S protein 8 (Predicted), isoform CRA a                                                                                                                                                                                                                                                   |
| NADH dehydrogenase (Ubiquinone) protein 7                            | mitochondrial respiratory chain<br>Fe-S<br><b>complex I;</b><br>synaptic membrane;<br>neuron projection;<br>mitochondrial inner membrane;<br>mitochondrion;<br>neuronal cell body                                                                                                                                       | mitochondrial respiratory chain complex I assembly;<br>oxidation-reduction process                                                                                                                                                                                                                                                                 | quinone binding;<br>iron-sulfur cluster binding;<br>NADH dehydrogenase (ubiquinone) activity;<br>NADH dehydrogenase activity;<br>oxidoreductase activity;<br>4 iron, 4 sulfur cluster binding;<br>protease binding;<br>metal ion binding                                                                                    |
| ATP synthase subunit beta                                            | mitochondrial inner membrane;<br>mitochondrial nucleoid;<br>mitochondrion;<br>plasma membrane;<br>proton-transporting <b>ATP synthase complex, catalytic core F(1);</b><br>proton-transporting two-sector ATPase complex, catalytic domain;<br>myelin sheath;<br>mitochondrial proton-transporting ATP synthase complex | osteoblast differentiation;<br>angiogenesis;<br>ATP biosynthetic process;<br>transport;<br>ATP synthesis coupled proton transport;<br>regulation of intracellular pH;<br>ion transport;<br>negative regulation of cell adhesion involved in substrate-bound cell migration;<br>lipid metabolic process;<br>ATP hydrolysis coupled proton transport | ATP binding;<br>proton-transporting ATPase activity, rotational mechanism;<br>proton-transporting ATP synthase activity, rotational mechanism;<br>nucleotide binding;<br>MHC class I protein binding;<br>ATPase activity;<br>hydrolase activity, acting on acid anhydrides, catalyzing transmembrane movement of substances |
| Cytochrome c oxidase subunit 6B1                                     | mitochondrion                                                                                                                                                                                                                                                                                                           | hydrogen ion transmembrane transport                                                                                                                                                                                                                                                                                                               | cytochrome-c oxidase activity                                                                                                                                                                                                                                                                                               |
| Pyruvate dehydrogenase component subunit E1                          | mitochondrion;<br>mitochondrial matrix;<br>pyruvate                                                                                                                                                                                                                                                                     | glucose metabolic process;<br>metabolic process;<br>carbohydrate metabolic process;                                                                                                                                                                                                                                                                | catalytic activity;<br>pyruvate dehydrogenase (acetyl-transferring) activity;                                                                                                                                                                                                                                               |

|                                                                                                |                                                                                                                                              |                                                                                                                                                                                                                                                                                                              |                                                                                                                                                                                                                                |
|------------------------------------------------------------------------------------------------|----------------------------------------------------------------------------------------------------------------------------------------------|--------------------------------------------------------------------------------------------------------------------------------------------------------------------------------------------------------------------------------------------------------------------------------------------------------------|--------------------------------------------------------------------------------------------------------------------------------------------------------------------------------------------------------------------------------|
| beta, mitochondrial                                                                            | dehydrogenase complex                                                                                                                        | tricarboxylic acid cycle; oxidation-reduction process; acetyl-CoA biosynthetic process from pyruvate                                                                                                                                                                                                         | oxidoreductase activity; pyruvate dehydrogenase activity                                                                                                                                                                       |
| Dihydrolipoamide S-succinyltransferase (E2 component of 2-oxoglutarate complex), isoform CRA a | mitochondrion; oxoglutarate dehydrogenase complex; membrane; myelin sheath                                                                   | metabolic process; tricarboxylic acid cycle; 2-oxoglutarate metabolic process; NADH metabolic process                                                                                                                                                                                                        | chaperone binding; transferase activity; heat shock protein binding; transferase activity, transferring acyl groups; dihydrolipoyllysine-residue succinyltransferase activity                                                  |
| GM2 ganglioside activator                                                                      | mitochondrion; hydrogen:potassium-exchanging ATPase complex                                                                                  | neurological system process; ganglioside catabolic process; lipid transport; ganglioside metabolic process; membrane fusion; oligosaccharide catabolic process; positive regulation of hydrolase activity; neuromuscular process controlling balance; lipid storage; learning or memory                      | lipid transporter activity; beta-N-acetylhexosaminidase activity; beta-N-acetylgalactosaminidase activity; phospholipase activator activity; enzyme activator activity                                                         |
| Carboxypeptidase                                                                               | mitochondrion                                                                                                                                | proteolysis                                                                                                                                                                                                                                                                                                  | serine-type carboxypeptidase activity                                                                                                                                                                                          |
| Thioredoxin                                                                                    | dendrite; mitochondrion; neuronal cell body; axon                                                                                            | cellular response to glucose stimulus; positive regulation of DNA binding; response to activity; cell redox homeostasis; regulation of protein import into nucleus, translocation; response to drug; cellular response to hyperoxia; response to selenium ion; response to axon injury; sulfate assimilation | thioredoxin-disulfide reductase activity; oxidoreductase activity, acting on a sulfur group of donors, disulfide as acceptor; protein disulfide oxidoreductase activity; enzyme binding                                        |
| Phosphatidylethanolamine-binding protein 1                                                     | synaptic vesicle; neuron projection; mitochondrion; axon terminus; mitochondrial outer membrane; membrane; neuronal cell body; myelin sheath | hippocampus development; positive regulation of cAMP-mediated signaling; negative regulation of peptidase activity; spermatid development; response to heat; response to corticosterone; response to organic cyclic compound; positive regulation of mitotic nuclear                                         | ATP binding; serine-type endopeptidase inhibitor activity; receptor binding; protein kinase binding; mitogen-activated protein kinase binding; nucleotide binding; peptidase inhibitor activity; lipid binding; kinase binding |

|                                                                                                                             |                                                                                                                              |  |                                                                                                                                                                                                                                                                             |                                                                                                                                                                                                                                                                                                                                                                                                                                                                                                               |
|-----------------------------------------------------------------------------------------------------------------------------|------------------------------------------------------------------------------------------------------------------------------|--|-----------------------------------------------------------------------------------------------------------------------------------------------------------------------------------------------------------------------------------------------------------------------------|---------------------------------------------------------------------------------------------------------------------------------------------------------------------------------------------------------------------------------------------------------------------------------------------------------------------------------------------------------------------------------------------------------------------------------------------------------------------------------------------------------------|
|                                                                                                                             |                                                                                                                              |  | division;<br>MAPK cascade;<br>response to organonitrogen<br>compound                                                                                                                                                                                                        |                                                                                                                                                                                                                                                                                                                                                                                                                                                                                                               |
| Malate dehydrogenase,<br>mitochondrial                                                                                      | mitochondrial inner<br>membrane;<br>mitochondrion;<br>plasma membrane;<br>myelin sheath;<br>mitochondrial matrix             |  | oxaloacetate metabolic process;<br>carbohydrate metabolic process;<br>tricarboxylic acid cycle;<br>oxidation-reduction process;<br>NADH metabolic process;<br>internal protein amino acid<br>acetylation;<br>malate metabolic process;<br>carboxylic acid metabolic process | catalytic activity;<br>poly(A) RNA binding;<br>L-malate dehydrogenase activity;<br>malate dehydrogenase (NADP+)<br>activity;<br>malate dehydrogenase activity;<br>oxidoreductase activity;<br>protein self-association;<br>protein binding;<br>oxidoreductase activity, acting on<br>the CH-OH group of donors, NAD or<br>NADP as acceptor<br>dihydrolipoyllysine-residue<br>acetyltransferase activity;<br>transferase activity;<br>transferase activity, transferring acyl<br>groups;<br>nucleotide binding |
| Dihydrolipoyllysine-<br>residue<br>acetyltransferase<br>component of pyruvate<br>dehydrogenase<br>complex,<br>mitochondrial | mitochondrion;<br>myelin sheath;<br>mitochondrial matrix;<br>pyruvate<br>dehydrogenase<br>complex                            |  | glucose metabolic process;<br>metabolic process;<br>carbohydrate metabolic process;<br>sleep;<br>tricarboxylic acid cycle;<br>pyruvate metabolic process;<br>acetyl-CoA biosynthetic process<br>from pyruvate                                                               |                                                                                                                                                                                                                                                                                                                                                                                                                                                                                                               |
| Protein FAM136A<br>Long-chain fatty acid<br>transport protein 1                                                             | mitochondrion<br>mitochondrial inner<br>membrane;<br>mitochondrion;<br>plasma membrane;<br>integral component of<br>membrane |  | metabolic process;<br>lipid transport;<br>transport;<br>long-chain fatty acid metabolic<br>process;<br>lipid metabolic process;<br>fatty acid transport;<br>fatty acid metabolic process                                                                                    | catalytic activity;<br>fatty acid transporter activity;<br>nucleotide binding;<br>ligase activity;<br>protein binding;<br>long-chain fatty acid-CoA ligase<br>activity;<br>very long-chain fatty acid-CoA<br>ligase activity                                                                                                                                                                                                                                                                                  |
| Protein Dnajc19                                                                                                             | mitochondrial inner<br>membrane;<br>mitochondrion                                                                            |  | visual perception;<br>protein import into mitochondrial<br>matrix;<br>positive regulation of ATPase<br>activity;<br>genitalia development                                                                                                                                   | protein transporter activity;<br>ATPase activator activity                                                                                                                                                                                                                                                                                                                                                                                                                                                    |
| ADP-ribosylhydrolase<br>like 2                                                                                              | mitochondrion                                                                                                                |  | metabolic process;                                                                                                                                                                                                                                                          | hydrolase activity                                                                                                                                                                                                                                                                                                                                                                                                                                                                                            |
| Hydroxyacyl<br>glutathione hydrolase                                                                                        | mitochondrion                                                                                                                |  | cellular response to superoxide<br>carbohydrate metabolic process;<br>spermatogenesis;<br>glutathione metabolic process;<br>methylglyoxal catabolic process to<br>D-lactate via S-lactoyl-glutathione                                                                       | hydroxyacylglutathione hydrolase<br>activity;<br>hydrolase activity                                                                                                                                                                                                                                                                                                                                                                                                                                           |
| Endophilin-B1                                                                                                               | mitochondrion;<br>mitochondrial outer                                                                                        |  | apoptotic process                                                                                                                                                                                                                                                           | lipid binding                                                                                                                                                                                                                                                                                                                                                                                                                                                                                                 |

|                                                                   |                                                                                                                  |                                                                                                                                                                                                                                                                                                                                                                                                                                                                                             |                                                                                                                                                                                                                                                                                                                  |
|-------------------------------------------------------------------|------------------------------------------------------------------------------------------------------------------|---------------------------------------------------------------------------------------------------------------------------------------------------------------------------------------------------------------------------------------------------------------------------------------------------------------------------------------------------------------------------------------------------------------------------------------------------------------------------------------------|------------------------------------------------------------------------------------------------------------------------------------------------------------------------------------------------------------------------------------------------------------------------------------------------------------------|
| Alpha-synuclein                                                   | membrane;<br>membrane;<br>autophagosome<br>synaptic vesicle;<br>mitochondrion;<br>axon terminus;<br>cytoskeleton | regulation of dopamine secretion;<br>dopamine biosynthetic process;<br>response to interleukin-1;<br>positive regulation of peptidyl-serine phosphorylation;<br>activation of cysteine-type endopeptidase activity involved in apoptotic process;<br>synaptic vesicle transport;<br>long-term synaptic potentiation;<br>regulation of neuronal synaptic plasticity;<br>negative regulation of platelet-derived growth factor receptor signaling pathway;<br>response to iron(II) ion        | dynein binding;<br>beta-tubulin binding;<br>identical protein binding;<br>magnesium ion binding;<br>cysteine-type endopeptidase inhibitor activity involved in apoptotic process;<br>calcium ion binding;<br>phospholipase binding;<br>arachidonic acid binding;<br>alpha-tubulin binding;<br>copper ion binding |
| Mitochondrial fission regulator 1-like                            | mitochondrion                                                                                                    | mitochondrial fission;                                                                                                                                                                                                                                                                                                                                                                                                                                                                      | Mitochondrial fission regulator 1-like                                                                                                                                                                                                                                                                           |
| 1-phosphatidylinositol 4,5-bisphosphate phosphodiesterase delta-1 | mitochondrial membrane                                                                                           | response to prostaglandin F;<br>regulation of phospholipase C activity;<br>response to organonitrogen compound;<br>response to aluminum ion;<br>positive regulation of cytosolic calcium ion concentration involved in phospholipase C-activating G-protein coupled signaling pathway;<br>response to hyperoxia;<br>lipid catabolic process;<br>G-protein coupled receptor signaling pathway;<br>signal transduction;<br>positive regulation of inositol trisphosphate biosynthetic process | phosphoric diester hydrolase activity;<br>calcium ion binding;<br>signal transducer activity;<br>phosphatidylinositol phospholipase C activity;<br>phospholipid binding;<br>hydrolase activity;<br>protein binding;<br>phosphatidylinositol-4,5-bisphosphate binding;<br>metal ion binding                       |
| Mitochondrial ribosomal protein L4 (Predicted), isoform CRA b     | mitochondrion                                                                                                    | translation                                                                                                                                                                                                                                                                                                                                                                                                                                                                                 | structural constituent of ribosome;<br>poly(A) RNA binding;<br>RNA binding                                                                                                                                                                                                                                       |
| Peptidylprolyl isomerase                                          | neuron projection;<br>mitochondrion                                                                              | positive regulation of ubiquitin-protein transferase activity;<br>metabolic process;<br>negative regulation of cell motility;<br>positive regulation of neuron apoptotic process;<br>negative regulation of neuron                                                                                                                                                                                                                                                                          | mitogen-activated protein kinase kinase binding;<br>phosphoserine binding;<br>phosphothreonine binding;<br>isomerase activity;<br>protein binding;<br>GTPase activating protein binding;                                                                                                                         |

|                                                               |                                          |       |  |                                                                                                                                                                                                                                                                          |                                                                     |
|---------------------------------------------------------------|------------------------------------------|-------|--|--------------------------------------------------------------------------------------------------------------------------------------------------------------------------------------------------------------------------------------------------------------------------|---------------------------------------------------------------------|
|                                                               |                                          |       |  | apoptotic process;<br>negative regulation of ERK1 and ERK2 cascade;<br>positive regulation of cell growth involved in cardiac muscle cell development;<br>positive regulation of GTPase activity;<br>protein peptidyl-prolyl isomerization;<br>regulation of cytokinesis | peptidyl-prolyl cis-trans isomerase activity                        |
| Protein Slirp                                                 | mitochondrion;<br>intracellular          |       |  | spermatid development;<br>mitochondrion morphogenesis;<br>negative regulation of mitochondrial RNA catabolic process;<br>sperm motility;<br>single fertilization                                                                                                         | poly(A) RNA binding;<br>nucleotide binding;<br>nucleic acid binding |
| Mitochondrial import inner membrane translocase subunit Tim13 | mitochondrial membrane;<br>mitochondrion | inner |  | protein transport;<br>transport                                                                                                                                                                                                                                          | metal ion binding                                                   |

**Table 4. Down-regulated mitochondrial proteins compared EA to CUMS**

| Name                                                          | cellular component                                                                                           |                | biological process                                                                                                                | molecular function                                                                                                   |
|---------------------------------------------------------------|--------------------------------------------------------------------------------------------------------------|----------------|-----------------------------------------------------------------------------------------------------------------------------------|----------------------------------------------------------------------------------------------------------------------|
| NADH-ubiquinone oxidoreductase chain 1                        | mitochondrial membrane;<br>mitochondrion                                                                     | inner          | oxidation-reduction process                                                                                                       | NADH dehydrogenase (ubiquinone) activity;<br>oxidoreductase activity                                                 |
| NADH-ubiquinone oxidoreductase chain 4                        | mitochondrion                                                                                                |                | oxidation-reduction process;<br>mitochondrial electron transport, NADH to ubiquinone;<br>ATP synthesis coupled electron transport | NADH dehydrogenase (ubiquinone) activity;<br>oxidoreductase activity                                                 |
| NADH-ubiquinone oxidoreductase chain 5                        | mitochondrial membrane;<br>mitochondrion;<br>respiratory chain                                               | inner          | oxidation-reduction process;<br>ATP synthesis coupled electron transport                                                          | NADH dehydrogenase (ubiquinone) activity;<br>oxidoreductase activity                                                 |
| NADH dehydrogenase [ubiquinone] flavoprotein 3, mitochondrial | mitochondrial respiratory chain complex I;<br>mitochondrial membrane;<br>mitochondrion;<br>respiratory chain | chain<br>inner | oxidation-reduction process                                                                                                       | NADH dehydrogenase [ubiquinone] flavoprotein 3, mitochondrial OS=Rattus norvegicus GN=Ndufv3 PE=3 SV=1 - [NDUV3_RAT] |
| NADH dehydrogenase [ubiquinone] 1 alpha subcomplex subunit 9, | mitochondrial respiratory chain complex I;                                                                   | chain          | response to glucose;<br>ubiquinone-6 biosynthetic process;<br>oxidation-reduction process                                         | NADH dehydrogenase activity                                                                                          |



|                                                 |                                                                                                                                                  |       |                                                                                                                                                                                                                        |               |  |                                                                                                                            |
|-------------------------------------------------|--------------------------------------------------------------------------------------------------------------------------------------------------|-------|------------------------------------------------------------------------------------------------------------------------------------------------------------------------------------------------------------------------|---------------|--|----------------------------------------------------------------------------------------------------------------------------|
| mitochondrial                                   | mitochondrion;<br>respiratory chain;<br>mitochondrial matrix                                                                                     |       |                                                                                                                                                                                                                        |               |  |                                                                                                                            |
| Cytochrome c oxidase subunit 7B, mitochondrial  | mitochondrial membrane;<br>mitochondrion;<br>integral component of membrane;<br>respiratory chain complex IV;<br>mitochondrial respiratory chain | inner | central nervous system development;<br>hydrogen ion transport                                                                                                                                                          | transmembrane |  | cytochrome-c oxidase activity                                                                                              |
| Cytochrome c oxidase subunit 7C, mitochondrial  | mitochondrial membrane;<br>mitochondrion;<br>integral component of membrane                                                                      | inner | hydrogen ion transport                                                                                                                                                                                                 | transmembrane |  | cytochrome-c oxidase activity                                                                                              |
| Cytochrome c oxidase subunit 6A1, mitochondrial | mitochondrial membrane;<br>mitochondrion;<br>mitochondrial respiratory chain complex IV                                                          | inner | hydrogen ion transport                                                                                                                                                                                                 | transmembrane |  | cytochrome-c oxidase activity                                                                                              |
| Cytochrome c oxidase subunit 7A2, mitochondrial | mitochondrial membrane;<br>mitochondrion;<br>mitochondrial respiratory chain                                                                     | inner | hydrogen ion transport                                                                                                                                                                                                 | transmembrane |  | cytochrome-c oxidase activity;<br>electron carrier activity                                                                |
| Phospholipid scramblase 3                       | mitochondrion;<br>mitochondrial membrane                                                                                                         |       | glucose homeostasis;<br>apoptotic process;<br>phospholipid scrambling;<br>cellular response to lipopolysaccharide;<br>cholesterol homeostasis                                                                          |               |  | phospholipid scramblase activity;<br>SH3 domain binding;<br>calcium-dependent protein binding                              |
| Nucleoside diphosphate kinase                   | mitochondrion                                                                                                                                    |       | nucleoside phosphorylation;<br>UTP biosynthetic process;<br>phosphorylation;<br>GTP biosynthetic process;<br>CTP biosynthetic process                                                                                  | diphosphate   |  | ATP binding;<br>nucleoside diphosphate kinase activity;<br>kinase activity;<br>transferase activity;<br>nucleotide binding |
| Protein Tomm7                                   | mitochondrion;<br>integral component of mitochondrial membrane;<br>mitochondrial membrane translocase complex                                    | outer | positive regulation of protein targeting to mitochondrion;<br>protein import into mitochondrial matrix;<br>mitophagy in response to mitochondrial depolarization;<br>protein import into mitochondrial outer membrane; |               |  | protein channel activity                                                                                                   |

|                                                 |                                                                                                 |                |                                                                                                                                                                                                                                                                                                                                                  |                                                                                                                                                                                                                                                              |
|-------------------------------------------------|-------------------------------------------------------------------------------------------------|----------------|--------------------------------------------------------------------------------------------------------------------------------------------------------------------------------------------------------------------------------------------------------------------------------------------------------------------------------------------------|--------------------------------------------------------------------------------------------------------------------------------------------------------------------------------------------------------------------------------------------------------------|
| Mitochondrial pyruvate carrier 2                | mitochondrial membrane; mitochondrion                                                           | inner          | regulation of protein stability<br>transport;<br>pyruvate transmembrane transport;<br>pyruvate metabolic process;<br>mitochondrial pyruvate transport                                                                                                                                                                                            | pyruvate transmembrane transporter activity                                                                                                                                                                                                                  |
| Ras-related protein Rab-8B                      | synaptic vesicle; mitochondrion                                                                 |                | protein transport;<br>adherens junction organization;<br>protein secretion;<br>vesicle docking involved in exocytosis;<br>positive regulation of cell projection organization;<br>small GTPase mediated signal transduction;<br>transport;<br>cellular response to insulin stimulus;<br>regulation of exocytosis;<br>synaptic vesicle exocytosis | GDP binding;<br>GTPase activity;<br>receptor binding;<br>nucleotide binding;<br>protein binding;<br>TPR domain binding;<br>GTP binding                                                                                                                       |
| Solute carrier family 25 member 51              | mitochondrial membrane                                                                          | inner          | mitochondrial inner membrane;                                                                                                                                                                                                                                                                                                                    | Solute carrier family 25 member 51                                                                                                                                                                                                                           |
| Serine/threonine-protein kinase A-Raf           | mitochondrion; cytosol                                                                          |                | MAPK cascade;<br>phosphorylation;<br>regulation of proteasomal ubiquitin-dependent protein catabolic process;<br>activation of MAPKK activity;<br>signal transduction;<br>regulation of TOR signaling;<br>protein phosphorylation;<br>intracellular signal transduction                                                                          | protein kinase activity;<br>ATP binding;<br>MAP kinase kinase kinase activity;<br>protein serine/threonine kinase activity;<br>kinase activity;<br>transferase activity;<br>nucleotide binding;<br>receptor signaling protein activity;<br>metal ion binding |
| Myelin-associated oligodendrocyte basic protein | mitochondrion; myelin sheath                                                                    |                | nervous system development                                                                                                                                                                                                                                                                                                                       | structural constituent of myelin sheath                                                                                                                                                                                                                      |
| Protein Nars                                    | mitochondrion                                                                                   |                | asparaginyl-tRNA aminoacylation;<br>tRNA aminoacylation for protein translation;<br>translation                                                                                                                                                                                                                                                  | aminoacyl-tRNA ligase activity;<br>ATP binding;<br>asparagine-tRNA ligase activity;<br>nucleotide binding;<br>nucleic acid binding;<br>ligase activity                                                                                                       |
| Mitochondrial fission 1 protein                 | mitochondrion; integral component of mitochondrial membrane; peroxisome; mitochondrial membrane | outer<br>outer | regulation of mitochondrion organization;<br>positive regulation of protein targeting to membrane;<br>peroxisome fission;<br>positive regulation of mitochondrial calcium ion concentration;<br>positive regulation of cysteine-type endopeptidase activity involved in apoptotic process;                                                       | receptor binding                                                                                                                                                                                                                                             |

|                                                |                                                          |       |                                                                                                                                                                                                                                                                                     |                                                                                                                                                                                                                                                |
|------------------------------------------------|----------------------------------------------------------|-------|-------------------------------------------------------------------------------------------------------------------------------------------------------------------------------------------------------------------------------------------------------------------------------------|------------------------------------------------------------------------------------------------------------------------------------------------------------------------------------------------------------------------------------------------|
|                                                |                                                          |       |                                                                                                                                                                                                                                                                                     | positive regulation of intrinsic apoptotic signaling pathway;<br>protein homooligomerization;<br>mitochondrion morphogenesis;<br>negative regulation of endoplasmic reticulum calcium ion concentration;<br>protein targeting to mitochondrion |
| Growth hormone-inducible transmembrane protein | mitochondrial membrane;<br>mitochondrion                 | inner | apoptotic process                                                                                                                                                                                                                                                                   |                                                                                                                                                                                                                                                |
| Sodium/hydrogen exchanger                      | dendrite;<br>mitochondrion;<br>axon terminus;<br>synapse |       | neuron projection morphogenesis;<br>sodium ion transport;<br>transport;<br>regulation of pH;<br>regulation of neurotrophin TRK receptor signaling pathway;<br>synapse organization;<br>transmembrane transport;<br>dendritic spine development;<br>ion transport;<br>axon extension | solute:proton antiporter activity;<br>sodium:proton antiporter activity;<br>antiporter activity                                                                                                                                                |

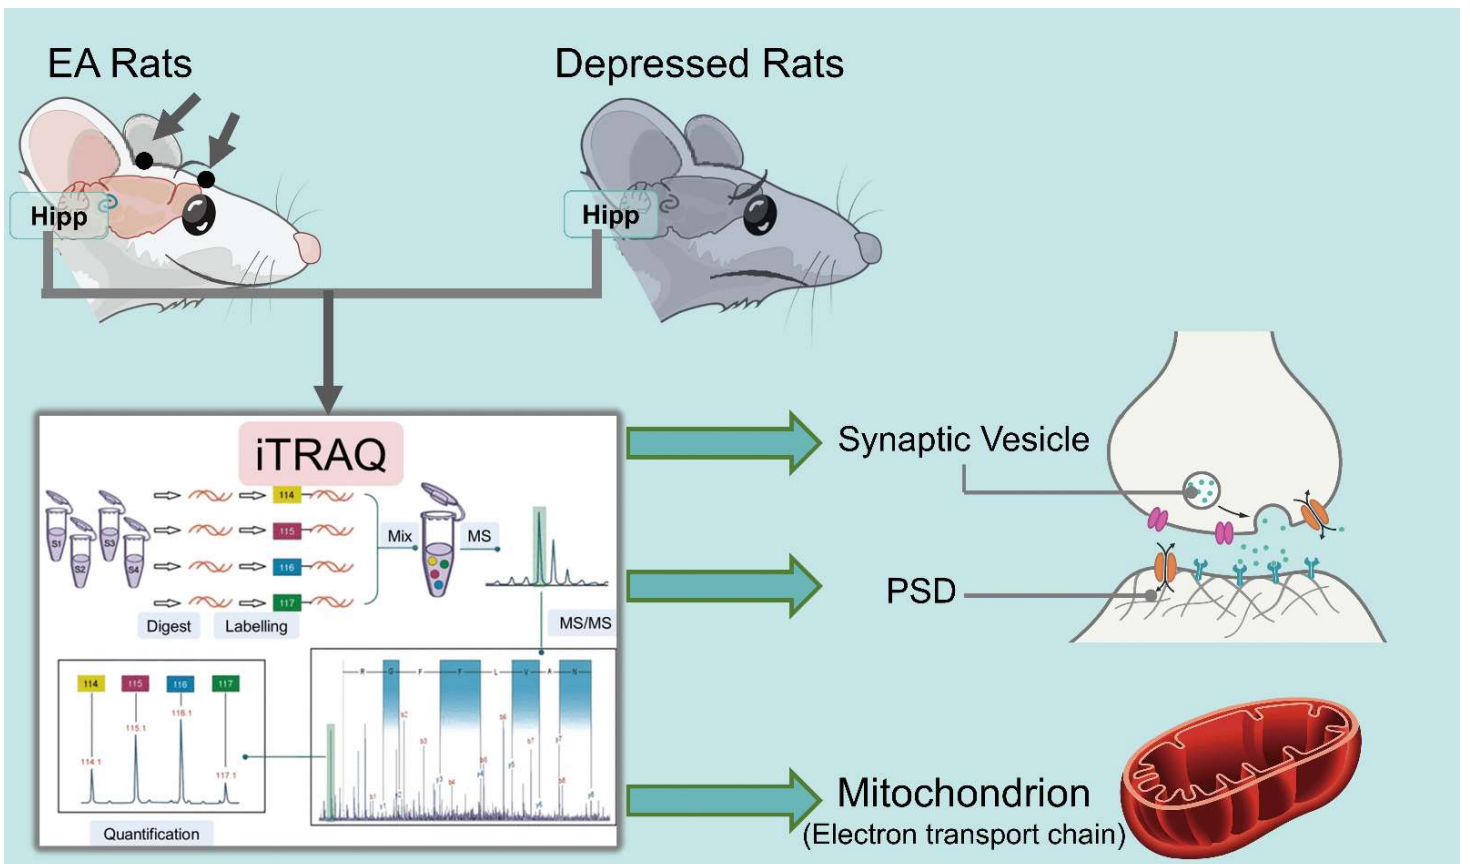

Graphic abstract

EA: EA. Hipp, hippocampus. PSD: postsynaptic density.
